# Supplementary material for: Ketogenic diet aggravates colitis, impairs intestinal barrier and alters gut microbiota and metabolism in DSS-induced mice
Source: Royal Society of Chemistry journal article supplement (doi:10.1039/d1fo02288a), 2021-01-01
Supplement: d1fo02288a1.pdf [file d1fo02288a1.pdf]

## Supplemental files

### **Ketogenic Diet Aggravates DSS-induced Colitis in Mice by Modulating Microbiota and Metabolism**

Shengjie Li, Aoxiang Zhuge, Kaicen Wang, Longxian Lv, Xiaoyuan Bian, Liya Yang, Jiafeng Xia, Xianwan Jiang, Wenrui Wu, Shuting Wang, Qiangqiang Wang and Lanjuan Li\*

Dr. S. Li, Dr. A. Zhuge, Dr. K. Wang, Dr. L. Lv, Dr. X. Bian, Dr. L. Yang, Dr. J. Xia, Dr. X. Jiang, Dr. W. Wu, Dr. S. Wang, Dr. Q. Wang, Prof. L. Li

State Key Laboratory for Diagnosis and Treatment of Infectious Diseases, National Clinical Research Center for Infectious Diseases, Collaborative Innovation Center for Diagnosis and Treatment of Infectious Diseases, The First Affiliated Hospital, College of Medicine Zhejiang University

Hangzhou 310003, P. R. China

E-mail: ljli@zju.edu.cn

**Table S1** The detailed formula of ketogenic diet and the control diet.

| <b>Formula of Ketogenic Diet</b>   | <b>g/Kg</b> | <b>Formula of Control Diet</b>     | <b>g/Kg</b> |
|------------------------------------|-------------|------------------------------------|-------------|
| Casein                             | 173.3       | Casein                             | 100.0       |
| DL-Methionine                      | 2.6         | DL-Methionine                      | 1.6         |
| Vegetable Shortening, hydrogenated | 586.4       | Vegetable Shortening, hydrogenated | 25.0        |
| Corn Oil                           | 86.2        | Corn Oil                           | 25.0        |
| Cellulose                          | 87.97       | Cellulose                          | 34.918      |
| Vitamin Mix, Teklad                | 13.0        | Corn Starch                        | 512.46      |
| Choline Bitartrate                 | 2.5         | Maltodextrin                       | 155.0       |
| TBHQ, antioxidant                  | 0.13        | Sucrose                            | 100.0       |
| Mineral Mix, Ca-P Deficient        | 20.0        | Vitamin Mix, AIN-93-VX w/Cellulose | 15.0        |
| Calcium Phosphate, dibasic         | 19.3        | Thiamin (81%)                      | 0.01        |
| Calcium Carbonate                  | 8.2         | Vitamin K1, phylloquinone          | 0.002       |
| Magnesium Oxide                    | 0.4         | Choline Bitartrate                 | 2.5         |
|                                    |             | Mineral Mix, w/o Ca & P            | 13.39       |
|                                    |             | Calcium Phosphate, dibasic         | 9.8         |
|                                    |             | Calcium Carbonate                  | 5.25        |
|                                    |             | TBHQ, antioxidant                  | 0.07        |

**Table S2** Primer pairs for Real-time Quantitative PCR analysis of indicated genes. *GADPH* was used as internal control.

| <b>Gene</b>                    | <b>Forward sequence (5'-3')</b> | <b>Reverse sequence (3'-5')</b> |
|--------------------------------|---------------------------------|---------------------------------|
| <i>GAPDH</i>                   | CCCTTAAGAGGGATGCTGCC            | ACTGTGCCGTTGAATTTGCC            |
| <i>IL-1<math>\beta</math></i>  | CCTGAACTCAACTGTGAAATGCC         | CAGCTTCTCCACAGCCACAATGAG        |
| <i>IL-6</i>                    | GGCGGATCGGATGTTGTGAT            | GGACCCCAGACAATCGGTTG            |
| <i>IL-10</i>                   | CAAGGAGCATTGAATTCCC             | GGCCTTGTAGACACCTTGGTC           |
| <i>IL-17</i>                   | TGAAAACACAGAAGTAACGTCCG         | CCCAGGAGGAAATTGTAATGGGA         |
| <i>TNF-<math>\alpha</math></i> | GGCCTCCCTCTCATCAGTTC            | GGTTGTCTTTGAGATCCATGC           |
| <i>ZO-1</i>                    | GCCGCTAAGAGCACAGCAA             | GCCCTCCTTTTAACACATCAGA          |
| <i>Occludin</i>                | TGAAAGTCCACCTCCTTACAGA          | CCGGATAAAAAGAGTACGCTGG          |

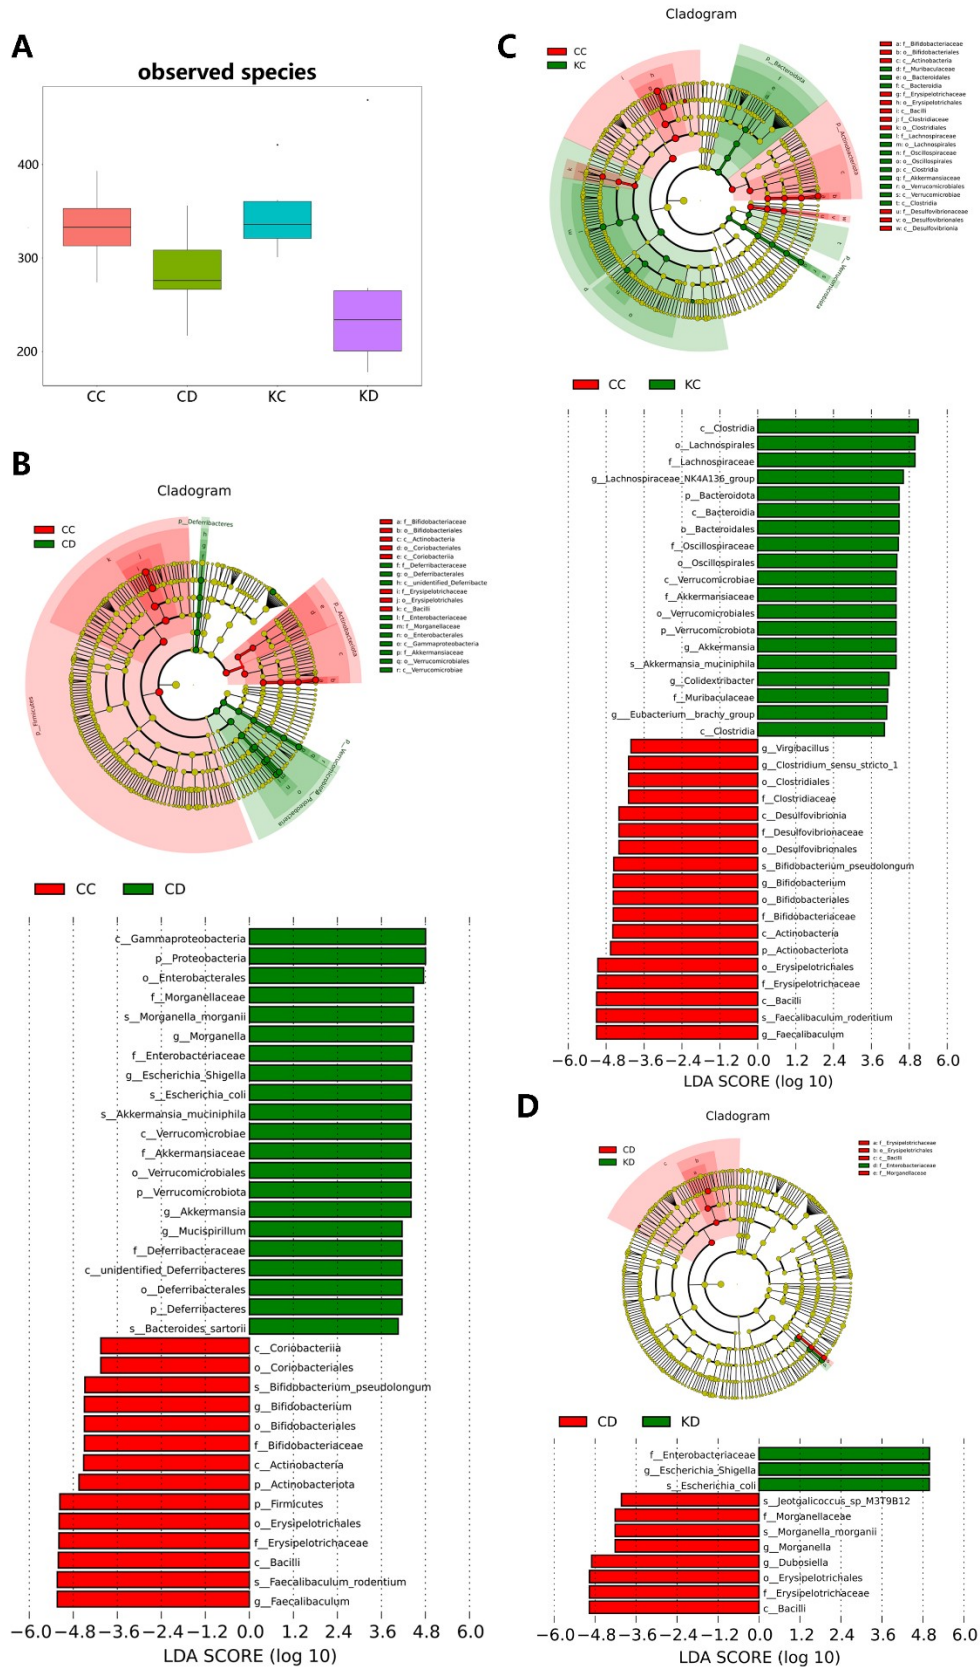

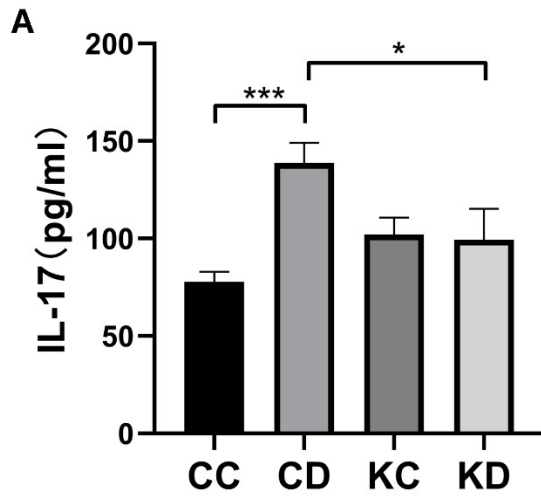

Figure S2. Ketogenic diet decreased the serum level of IL-17 in DSS-induced colitis. Data are shown as mean  $\pm$  SEM. \* $p < 0.05$ , \*\*\* $p < 0.001$ .
